# Supplementary material for: A contemporary review of breast cancer risk factors and the role of artificial intelligence
Source: PubMed Central journal article supplement (PMC11063273; doi:10.3389/fonc.2024.1356014), 2024-04-18
Supplement: DataSheet_1.pdf [file DataSheet_1.pdf]

female

breast cancer

breast tumor

breast neoplasms

cancer

risk factors

menopause

postmenopause

premenopause

epidermal growth factor receptor 2

triple negative breast cancer

cancer screening

estrogen receptor

progesterone receptor

cancer prognosis

artificial intelligence

overall survival

retrospective studies

male breast density

body mass index

middle aged

lifestyle

obesity

procedures

mammography

united states

educational status

adolescent

prognosis

menarche

pregnancy

cancer patient

race

family history

smoking

genetics

brca1

protein

parity

diet

prediction

young adult

alcohol consumption

germline mutation

machine learning

cancer survival

brca2 protein
